# Supplementary material for: Focal adhesion kinase inhibitor TAE226 combined with Sorafenib slows down hepatocellular carcinoma by multiple epigenetic effects
Source: J Exp Clin Cancer Res. 2021 Nov 16;40:364. doi: 10.1186/s13046-021-02154-8 (PMC8597092; doi:10.1186/s13046-021-02154-8)
Supplement: Supplementary file 4 — Additional file 4: Table S4. Nuclear interactors of FAK. [file 13046_2021_2154_MOESM4_ESM.xlsx]

## Sheet: Table S3
Protein				Functional Annotations					HepG2														Huh7
									Sum PEP Score		Coverage [%]		Peptides		PSMs		Unique Peptides		Modifications		Score Sequest HT		Sum PEP Score		Coverage [%]		Peptides		PSMs		Unique Peptides		Modifications		Score Sequest HT
Accession	Description	Organism	Gene symbol	Biological Process	Cellular Component	Molecular Function	KEGG Pathways	Reactome Pathways	Gel 1	Gel 2	Gel 1	Gel 2	Gel 1	Gel 2	Gel 1	Gel 2	Gel 1	Gel 2	Gel 1	Gel 2	Gel 1	Gel 2	Gel 1	Gel 2	Gel 1	Gel 2	Gel 1	Gel 2	Gel 1	Gel 2	Gel 1	Gel 2	Gel 1	Gel 2	Gel 1	Gel 2
O00268	Transcription initiation factor TFIID subunit 4	Homo sapiens	TAF4	cell organization and biogenesis;metabolic process;regulation of biological process	cytosol;nucleus	DNA binding;protein binding	Basal transcription factors; Huntington's disease; Herpes simplex infection	RNA Polymerase II Transcription Initiation; HIV Transcription Initiation; RNA Polymerase II Transcription Pre-Initiation And Promoter Opening; RNA Polymerase II HIV Promoter Escape; Regulation of TP53 Activity through Phosphorylation; RNA Polymerase II Pre-transcription Events; RNA Polymerase II Promoter Escape	68.87	55.462	19	17	12	10	17	21	12	10			64.35	76.02	72.536	98.586	21	24	13	16	18	24	13	16			65.8	91.46
O14979	Heterogeneous nuclear ribonucleoprotein D-like	Homo sapiens	HNRNPDL	metabolic process;regulation of biological process;response to stimulus	cytoplasm;cytosol;nucleus;spliceosomal complex	DNA binding;protein binding;RNA binding		Gene and protein expression by JAK-STAT signaling after Interleukin-12 stimulation; Interleukin-12 family signaling	53.511	67.48	18	24	8	12	13	26	6	9			38.58	71.51	60.054	94.829	22	30	11	16	18	35	8	13			58.04	97.77
O43242	26S proteasome non-ATPase regulatory subunit 3	Homo sapiens	PSMD3	metabolic process;regulation of biological process;response to stimulus;transport	cytosol;extracellular;membrane;nucleus;organelle lumen;proteasome	catalytic activity;enzyme regulator activity;protein binding	Epstein-Barr virus infection; Proteasome	Regulation of RAS by GAPs; CDT1 association with the CDC6:ORC:origin complex; Downstream TCR signaling; UCH proteinases; NIK-->noncanonical NF-kB signaling; Hh mutants that don't undergo autocatalytic processing are degraded by ERAD; SCF-beta-TrCP mediated degradation of Emi1; Neutrophil degranulation; Cross-presentation of soluble exogenous antigens (endosomes); Separation of Sister Chromatids; …	63.722	138.713	37	60	17	31	23	67	17	31			70.18	202.36	77.641	114.19	40	47	19	23	36	31	19	23			100.96	91.18
O43396	Thioredoxin-like protein 1	Homo sapiens	TXNL1	cellular homeostasis;metabolic process;regulation of biological process;response to stimulus;transport	cytoplasm;cytosol;nucleus;proteasome	antioxidant activity;catalytic activity			52.286	117.582	45	63	8	15	9	33	8	15	Met-loss [N-Term]	Met-loss [N-Term]	33.56	109.34	54.666	97.427	45	56	9	13	11	22	9	13	Met-loss [N-Term]	Met-loss [N-Term]	39.51	71.68
O60684	Importin subunit alpha-7	Homo sapiens	KPNA6	regulation of biological process;transport	cytoplasm;cytosol;membrane;nucleus	protein binding;transporter activity			54.415	59.971	22	21	9	10	11	22	5	4			43.93	65.45	50.942	90.808	23	31	12	14	18	29	8	4			54.28	86.96
O60716	Catenin delta-1	Homo sapiens	CTNND1	cell organization and biogenesis;metabolic process;regulation of biological process;response to stimulus	cytoplasm;cytosol;membrane;nucleus	protein binding	Rap1 signaling pathway; Adherens junction; Leukocyte transendothelial migration	VEGFR2 mediated vascular permeability; Adherens junctions interactions; InlA-mediated entry of Listeria monocytogenes into host cells	153.611	219.253	33	42	25	33	77	114	25	32			252.53	353.15	78.712	134.739	23	29	18	20	42	57	18	20			114.28	184.92
O75448	Mediator of RNA polymerase II transcription subunit 24	Homo sapiens	MED24	metabolic process;regulation of biological process;response to stimulus	nucleus	protein binding;receptor activity	Thyroid hormone signaling pathway	Transcriptional regulation of white adipocyte differentiation; PPARA activates gene expression; Generic Transcription Pathway	74.224	94.495	18	22	15	18	21	30	15	18			71.87	94.13	67.544	135.693	16	28	12	21	18	39	12	21			54.48	133.11
O95163	Elongator complex protein 1	Homo sapiens	ELP1	cell organization and biogenesis;metabolic process;regulation of biological process;response to stimulus	cytoplasm;cytosol;nucleus	enzyme regulator activity;protein binding;signal transducer activity		HATs acetylate histones	137.552	128.206	28	26	27	25	46	37	27	25			146.27	114.83	68.499	85.954	20	17	19	17	20	24	19	17			54.58	75.24
O95239	Chromosome-associated kinesin KIF4A	Homo sapiens	KIF4A	cell organization and biogenesis;cellular component movement;metabolic process;transport	chromosome;cytoplasm;cytoskeleton;cytosol;membrane;nucleus	catalytic activity;DNA binding;metal ion binding;motor activity;nucleotide binding;protein binding		COPI-dependent Golgi-to-ER retrograde traffic; Kinesins; MHC class II antigen presentation; Recycling pathway of L1	100.754	115.907	29	23	26	25	43	35	18	15			122.72	97.37	55.697	196.66	15	34	14	36	19	71	8	36			49.38	222.7
P00338	L-lactate dehydrogenase A chain	Homo sapiens	LDHA	metabolic process;regulation of biological process;response to stimulus	cytoplasm;cytosol;membrane;nucleus	catalytic activity;nucleotide binding;protein binding	Propanoate metabolism; HIF-1 signaling pathway; Central carbon metabolism in cancer; Pyruvate metabolism; Glucagon signaling pathway; Glycolysis / Gluconeogenesis; Metabolic pathways; Cysteine and methionine metabolism	Pyruvate metabolism	76.935	211.585	46	61	16	25	31	124	16	24		Met-loss+Acetyl [N-Term]	88.71	344.25	63.11	147.569	35	66	13	28	33	79	13	28		Met-loss+Acetyl [N-Term]	89.11	200.38
P05089	Arginase-1	Homo sapiens	ARG1	cell organization and biogenesis;defense response;metabolic process;regulation of biological process;response to stimulus;transport	cytoplasm;cytosol;extracellular;membrane;nucleus;organelle lumen	catalytic activity;metal ion binding	Arginine biosynthesis; Amoebiasis; Biosynthesis of amino acids; Metabolic pathways; Arginine and proline metabolism	Urea cycle; Neutrophil degranulation	86.787	196.776	39	79	16	22	52	75	16	22			149.06	243.18	67.399	86.409	52	47	14	15	33	69	14	15			99.8	198.49
P08865	40S ribosomal protein SA	Homo sapiens	RPSA	cell organization and biogenesis;metabolic process;transport	cytoplasm;cytosol;membrane;nucleus;ribosome	protein binding;receptor activity;RNA binding;structural molecule activity	Ribosome	Peptide chain elongation; Eukaryotic Translation Termination; Viral mRNA Translation; Formation of the ternary complex, and subsequently, the 43S complex; L13a-mediated translational silencing of Ceruloplasmin expression; Selenocysteine synthesis; Nonsense Mediated Decay (NMD) independent of the Exon Junction Complex (EJC); Nonsense Mediated Decay (NMD) enhanced by the Exon Junction Complex (EJC)…	89.69	172.1	51	64	11	18	37	96	11	18	Met-loss+Acetyl [N-Term]	Met-loss+Acetyl [N-Term]	136.3	353.83	72.714	155.68	47	69	11	19	27	74	11	19	Met-loss+Acetyl [N-Term]	Met-loss+Acetyl [N-Term]	100.65	254.97
P16989	Y-box-binding protein 3	Homo sapiens	YBX3	metabolic process;regulation of biological process;response to stimulus	cytoplasm;cytosol;nucleus	DNA binding;protein binding;RNA binding	Tight junction		75.113	73.683	57	44	10	9	20	35	7	4	Met-loss+Acetyl [N-Term]	Met-loss+Acetyl [N-Term]	79.37	134.63	62.453	74.499	47	33	9	9	19	31	5	3	Met-loss+Acetyl [N-Term]	Met-loss+Acetyl [N-Term]	70.81	110.03
P18621	60S ribosomal protein L17	Homo sapiens	RPL17	cell organization and biogenesis;metabolic process;transport	cytosol;nucleus;ribosome	protein binding;RNA binding;structural molecule activity	Ribosome	Peptide chain elongation; Eukaryotic Translation Termination; Viral mRNA Translation; L13a-mediated translational silencing of Ceruloplasmin expression; Nonsense Mediated Decay (NMD) independent of the Exon Junction Complex (EJC); Selenocysteine synthesis; Nonsense Mediated Decay (NMD) enhanced by the Exon Junction Complex (EJC); GTP hydrolysis and joining of the 60S ribosomal subunit; Major path…	102.714	92.573	74	62	18	14	46	33	18	14	Met-loss [N-Term]	Met-loss [N-Term]	136.62	97.2	70.501	68.782	58	45	16	11	46	21	15	11	Met-loss [N-Term]	Met-loss [N-Term]	132.35	60.38
P19447	General transcription and DNA repair factor IIH helicase subunit XPB	Homo sapiens	ERCC3	cell death;cell differentiation;cell organization and biogenesis;metabolic process;regulation of biological process;response to stimulus	nucleus	catalytic activity;DNA binding;nucleotide binding;protein binding	Basal transcription factors; Nucleotide excision repair	Gap-filling DNA repair synthesis and ligation in TC-NER; RNA Polymerase I Chain Elongation; RNA Polymerase II Transcription Pre-Initiation And Promoter Opening; NoRC negatively regulates rRNA expression; Formation of TC-NER Pre-Incision Complex; Dual Incision in GG-NER; RNA Polymerase I Promoter Escape; Formation of HIV-1 elongation complex containing HIV-1 Tat; RNA Polymerase II Promoter Escape;…	69.95	72.183	29	23	14	13	18	21	14	13			55.05	70.33	84.884	71.538	28	22	14	15	19	30	14	15			60	95.52
P19784	Casein kinase II subunit alpha'	Homo sapiens	CSNK2A2	cell communication;cell death;metabolic process;regulation of biological process;response to stimulus	chromosome;cytoplasm;cytosol;membrane;nucleus	catalytic activity;nucleotide binding;protein binding	Tight junction; Epstein-Barr virus infection; Ribosome biogenesis in eukaryotes; NF-kappa B signaling pathway; Wnt signaling pathway; Adherens junction; Measles; Herpes simplex infection	WNT mediated activation of DVL; Condensation of Prometaphase Chromosomes; Regulation of PTEN stability and activity; Cooperation of PDCL (PhLP1) and TRiC/CCT in G-protein beta folding; Signal transduction by L1; RUNX1 interacts with co-factors whose precise effect on RUNX1 targets is not known; Synthesis of PC; Receptor Mediated Mitophagy; Regulation of TP53 Activity through Phosphorylation	73.533	143.093	45	67	10	20	13	38	10	19			47.45	124.76	54.251	91.953	41	49	12	13	14	19	11	13			45.72	65.35
P22059	Oxysterol-binding protein 1	Homo sapiens	OSBP	metabolic process;regulation of biological process;transport	cytoplasm;cytosol;endoplasmic reticulum;Golgi;membrane;nucleus	protein binding;transporter activity		Synthesis of bile acids and bile salts; Sphingolipid de novo biosynthesis	108.603	82.799	43	33	24	17	33	23	24	17			106.51	71.9	87.789	118.066	34	40	18	23	34	40	17	23			98.71	115.06
P22090	40S ribosomal protein S4, Y isoform 1	Homo sapiens	RPS4Y1	cell organization and biogenesis;development;metabolic process;transport	cytosol;membrane;nucleus;ribosome	RNA binding;structural molecule activity	Ribosome	Peptide chain elongation; Eukaryotic Translation Termination; Viral mRNA Translation; Formation of the ternary complex, and subsequently, the 43S complex; L13a-mediated translational silencing of Ceruloplasmin expression; Selenocysteine synthesis; Nonsense Mediated Decay (NMD) independent of the Exon Junction Complex (EJC); Nonsense Mediated Decay (NMD) enhanced by the Exon Junction Complex (EJC)…	90.397	103.28	60	53	20	17	72	88	4	6			195.15	218.82	55.208	60.925	31	31	11	12	46	62	1	2			122.54	156.23
P27348	14-3-3 protein theta	Homo sapiens	YWHAQ	cell organization and biogenesis;regulation of biological process;response to stimulus;transport	cytoplasm;cytosol;membrane;mitochondrion	protein binding	Viral carcinogenesis; Pathogenic Escherichia coli infection; Hepatitis B; Epstein-Barr virus infection; Hippo signaling pathway; Oocyte meiosis; Cell cycle; PI3K-Akt signaling pathway	Translocation of GLUT4 to the plasma membrane; Chk1/Chk2(Cds1) mediated inactivation of Cyclin B:Cdk1 complex; TP53 Regulates Metabolic Genes; Activation of BAD and translocation to mitochondria ; RHO GTPases activate PKNs	76.883	164.508	61	75	18	24	25	95	12	16		Acetyl [N-Term]	76.66	271.62	54.277	104.668	46	65	11	19	23	39	6	14			64.54	111.91
P27695	DNA-(apurinic or apyrimidinic site) endonuclease	Homo sapiens	AX1	cell organization and biogenesis;cellular homeostasis;metabolic process;regulation of biological process;response to stimulus	cytoplasm;endoplasmic reticulum;mitochondrion;nucleus;ribosome	catalytic activity;DNA binding;metal ion binding;protein binding;RNA binding	Base excision repair	POLB-Dependent Long Patch Base Excision Repair; Displacement of DNA glycosylase by APEX1; PCNA-Dependent Long Patch Base Excision Repair; Abasic sugar-phosphate removal via the single-nucleotide replacement pathway	123.076	166.458	62	63	17	18	26	46	17	18			97.3	167.83	68.823	209.224	40	72	9	23	11	43	9	23			49.57	159.31
P30050	60S ribosomal protein L12	Homo sapiens	RPL12	cell organization and biogenesis;metabolic process;transport	cytosol;membrane;ribosome	protein binding;RNA binding;structural molecule activity	Ribosome	Peptide chain elongation; Eukaryotic Translation Termination; Viral mRNA Translation; L13a-mediated translational silencing of Ceruloplasmin expression; Nonsense Mediated Decay (NMD) independent of the Exon Junction Complex (EJC); Selenocysteine synthesis; Nonsense Mediated Decay (NMD) enhanced by the Exon Junction Complex (EJC); GTP hydrolysis and joining of the 60S ribosomal subunit; Major path…	61.599	74.687	62	73	11	12	26	40	11	12			79.6	118.69	55.824	61.665	64	62	9	13	24	31	9	13			72.2	81.21
P31689	DnaJ homolog subfamily A member 1	Homo sapiens	DNAJA1	cellular component movement;metabolic process;regulation of biological process;response to stimulus;transport	cytoplasm;cytoskeleton;cytosol;endoplasmic reticulum;membrane;mitochondrion;nucleus	enzyme regulator activity;metal ion binding;nucleotide binding;protein binding	Protein processing in endoplasmic reticulum	HSP90 chaperone cycle for steroid hormone receptors (SHR)	64.687	83.984	37	36	10	11	13	21	10	11			48.42	67.53	50.971	83.365	32	36	9	12	14	17	9	12			46.05	61.09
P31944	Caspase-14	Homo sapiens	CASP14	cell death;cell differentiation;metabolic process	cytoplasm;cytosol;nucleus	catalytic activity;protein binding		Formation of the cornified envelope	99.36	237.988	47	75	14	22	56	87	14	22			167.68	279.72	57.1	83.373	38	43	11	12	40	59	11	12			106.57	168.61
P31946	14-3-3 protein beta/alpha	Homo sapiens	YWHAB	cell organization and biogenesis;metabolic process;regulation of biological process;response to stimulus;transport	cytoplasm;cytosol;membrane;mitochondrion;nucleus	protein binding	Viral carcinogenesis; Hepatitis B; Epstein-Barr virus infection; Hippo signaling pathway; Oocyte meiosis; Cell cycle; PI3K-Akt signaling pathway	MAP2K and MAPK activation; mTORC1-mediated signalling; Negative regulation of MAPK pathway; ARMS-mediated activation; Tristetraprolin (TTP, ZFP36) binds and destabilizes mRNA; Translocation of GLUT4 to the plasma membrane; Rap1 signalling; Paradoxical activation of RAF signaling by kinase inactive BRAF; Frs2-mediated activation; Butyrate Response Factor 1 (BRF1) binds and destabilizes mRNA; Inter…	80.711	159.243	57	65	17	21	24	99	9	10	Met-loss+Acetyl [N-Term]	Met-loss+Acetyl [N-Term]	73.38	298.63	59.158	90.515	40	61	10	16	21	34	5	9		Met-loss+Acetyl [N-Term]	68.43	102.87
P32969	60S ribosomal protein L9	Homo sapiens	RPL9P8	cell organization and biogenesis;metabolic process;transport	cytosol;membrane;nucleus;ribosome	protein binding;RNA binding;structural molecule activity	Ribosome	Peptide chain elongation; Eukaryotic Translation Termination; Viral mRNA Translation; L13a-mediated translational silencing of Ceruloplasmin expression; Nonsense Mediated Decay (NMD) independent of the Exon Junction Complex (EJC); Selenocysteine synthesis; Nonsense Mediated Decay (NMD) enhanced by the Exon Junction Complex (EJC); GTP hydrolysis and joining of the 60S ribosomal subunit; Major path…	97.201	86.217	55	56	12	11	45	30	12	11	Met-loss [N-Term]		167.91	100.31	58.358	80.516	48	58	10	13	34	34	10	13			120.85	117.89
P33992	DNA replication licensing factor MCM5	Homo sapiens	MCM5	cell division;metabolic process	membrane;nucleus	catalytic activity;DNA binding;nucleotide binding;protein binding	DNA replication; Cell cycle	M/G1 Transition; Assembly of the pre-replicative complex; Unwinding of DNA; Regulation of DNA replication; Activation of ATR in response to replication stress; Activation of the pre-replicative complex; Orc1 removal from chromatin; Removal of licensing factors from origins	60.263	150.887	26	44	14	30	19	53	14	30			58.04	155.22	73.384	197.041	33	53	22	39	49	76	22	39			131.3	227.88
P35222	Catenin beta-1	Homo sapiens	CTNNB1	cell communication;cell differentiation;cell growth;cell organization and biogenesis;cell proliferation;cellular component movement;metabolic process;regulation of biological process;response to stimulus;transport	cytoplasm;cytoskeleton;cytosol;membrane;nucleus	DNA binding;protein binding;signal transducer activity	Arrhythmogenic right ventricular cardiomyopathy (ARVC); Tight junction; Pathogenic Escherichia coli infection; Hippo signaling pathway; Rap1 signaling pathway; Endometrial cancer; Breast cancer; Colorectal cancer; Pathways in cancer; Prostate cancer; Thyroid hormone signaling pathway; HTLV-I infection; Melanogenesis; Wnt signaling pathway; Focal adhesion; Proteoglycans in cancer; Adherens junctio…	Beta-catenin phosphorylation cascade; CDO in myogenesis; Binding of TCF/LEF:CTNNB1 to target gene promoters; Apoptotic cleavage of cell adhesion proteins; RUNX3 regulates WNT signaling; S37 mutants of beta-catenin aren't phosphorylated; LRR FLII-interacting protein 1 (LRRFIP1) activates type I IFN production; Ca2+ pathway; S33 mutants of beta-catenin aren't phosphorylated; Disassembly of the dest…	161.272	307.799	45	57	29	38	70	159	24	32		Met-loss+Acetyl [N-Term]; Phospho [S675(100)]	217.46	454.16	100.218	142.899	31	40	19	26	37	54	15	21		Met-loss+Acetyl [N-Term]	99.37	147.35
P35249	Replication factor C subunit 4	Homo sapiens	RFC4	cell organization and biogenesis;cellular homeostasis;metabolic process;regulation of biological process;response to stimulus	nucleus	catalytic activity;DNA binding;nucleotide binding;protein binding	DNA replication; Mismatch repair; Nucleotide excision repair	Translesion Synthesis by POLH; Termination of translesion DNA synthesis; Translesion synthesis by POLI; Recognition of DNA damage by PCNA-containing replication complex; Translesion synthesis by REV1; Polymerase switching on the C-strand of the telomere; Regulation of TP53 Activity through Phosphorylation; PCNA-Dependent Long Patch Base Excision Repair; G2/M DNA damage checkpoint; Translesion syn…	107.935	121.61	66	56	23	22	32	36	23	22			95.25	103.66	53.066	150.385	43	71	14	24	26	48	14	24			71.05	140.19
P35998	26S proteasome regulatory subunit 7	Homo sapiens	PSMC2	cell differentiation;metabolic process;regulation of biological process;response to stimulus;transport	cytoplasm;cytosol;extracellular;membrane;nucleus;organelle lumen;proteasome	catalytic activity;nucleotide binding;protein binding	Epstein-Barr virus infection; Proteasome	Regulation of RAS by GAPs; CDT1 association with the CDC6:ORC:origin complex; Downstream TCR signaling; UCH proteinases; NIK-->noncanonical NF-kB signaling; Hh mutants that don't undergo autocatalytic processing are degraded by ERAD; SCF-beta-TrCP mediated degradation of Emi1; Neutrophil degranulation; Cross-presentation of soluble exogenous antigens (endosomes); Separation of Sister Chromatids; …	60.387	152.252	43	63	18	28	25	61	18	28		Met-loss [N-Term]	70.89	195.43	58.994	148.945	38	61	16	27	23	49	16	27		Met-loss [N-Term]	66.22	157.35
P36776	Lon protease homolog, mitochondrial	Homo sapiens	LONP1	cell organization and biogenesis;metabolic process;response to stimulus	cytosol;membrane;mitochondrion;nucleus;organelle lumen	catalytic activity;DNA binding;nucleotide binding;protein binding;RNA binding			64.715	58.457	20	19	15	14	18	24	15	14			53.23	70.44	58.465	78.893	20	18	15	14	23	19	15	14			65.12	59.98
P39019	40S ribosomal protein S19	Homo sapiens	RPS19	cell differentiation;cell organization and biogenesis;cellular component movement;defense response;metabolic process;regulation of biological process;response to stimulus;transport	cytoplasm;cytosol;membrane;nucleus;ribosome	protein binding;RNA binding;structural molecule activity	Ribosome	Peptide chain elongation; Eukaryotic Translation Termination; Viral mRNA Translation; Formation of the ternary complex, and subsequently, the 43S complex; L13a-mediated translational silencing of Ceruloplasmin expression; Selenocysteine synthesis; Nonsense Mediated Decay (NMD) independent of the Exon Junction Complex (EJC); Nonsense Mediated Decay (NMD) enhanced by the Exon Junction Complex (EJC)…	87.077	98.33	80	71	16	18	59	53	16	18	Met-loss [N-Term]	Met-loss [N-Term]	150.77	132.74	66.863	55.67	63	57	14	12	26	24	14	12	Met-loss [N-Term]	Met-loss [N-Term]	74.05	65.49
P39748	Flap endonuclease 1	Homo sapiens	FEN1	cell organization and biogenesis;cellular homeostasis;metabolic process;regulation of biological process;response to stimulus	membrane;mitochondrion;nucleus	catalytic activity;DNA binding;metal ion binding;protein binding	DNA replication; Non-homologous end-joining; Base excision repair	POLB-Dependent Long Patch Base Excision Repair; Early Phase of HIV Life Cycle; Removal of the Flap Intermediate; HDR through MMEJ (alt-NHEJ); PCNA-Dependent Long Patch Base Excision Repair; Removal of the Flap Intermediate from the C-strand	61.08	162.89	27	56	10	19	17	55	10	19			58.62	189.35	67.373	243.368	37	64	12	22	32	72	12	22		Met-loss [N-Term]	104.56	260.33
P40763	Signal transducer and activator of transcription 3	Homo sapiens	STAT3	cell differentiation;cell organization and biogenesis;cell proliferation;cellular component movement;defense response;metabolic process;regulation of biological process;reproduction;response to stimulus;transport	cytoplasm;cytosol;membrane;mitochondrion;nucleus	DNA binding;protein binding;signal transducer activity	Viral carcinogenesis; Inflammatory bowel disease (IBD); Hepatitis B; HIF-1 signaling pathway; Pancreatic cancer; FoxO signaling pathway; Prolactin signaling pathway; MicroRNAs in cancer; Epstein-Barr virus infection; Acute myeloid leukemia; Pathways in cancer; AGE-RAGE signaling pathway in diabetic complications; EGFR tyrosine kinase inhibitor resistance; Toxoplasmosis; Jak-STAT signaling pathway…	Interleukin-15 signaling; Signaling by Leptin; POU5F1 (OCT4), SOX2, NANOG activate genes related to proliferation; Interleukin-35 Signalling; Interleukin-10 signaling; Interleukin-7 signaling; Downstream signal transduction; Signalling to STAT3; Association of TriC/CCT with target proteins during biosynthesis; Signaling by cytosolic FGFR1 fusion mutants; MET activates STAT3; Signaling by SCF-KIT;…	93.974	127.776	30	36	18	21	43	42	18	21	Met-loss+Acetyl [N-Term]	Met-loss+Acetyl [N-Term]	146.25	135.94	58.566	125.697	21	39	11	24	18	35	11	24	Met-loss+Acetyl [N-Term]	Met-loss+Acetyl [N-Term]	61.96	113.47
P42224	Signal transducer and activator of transcription 1-alpha/beta	Homo sapiens	STAT1	cell death;cell differentiation;cell proliferation;cellular component movement;defense response;metabolic process;regulation of biological process;response to stimulus	cytoplasm;cytosol;nucleus	DNA binding;protein binding;signal transducer activity	Th1 and Th2 cell differentiation; Inflammatory bowel disease (IBD); NOD-like receptor signaling pathway; Osteoclast differentiation; Hepatitis B; Pancreatic cancer; Prolactin signaling pathway; Leishmaniasis; Pathways in cancer; Thyroid hormone signaling pathway; AGE-RAGE signaling pathway in diabetic complications; Tuberculosis; Toxoplasmosis; Jak-STAT signaling pathway; Measles; Toll-like recep…	Regulation of RUNX2 expression and activity; ISG15 antiviral mechanism; Interleukin-35 Signalling; Downstream signal transduction; Regulation of IFNA signaling; Regulation of IFNG signaling; Signaling by cytosolic FGFR1 fusion mutants; Signaling by SCF-KIT; Interleukin-6 family signaling; Interleukin-4 and 13 signaling; Growth hormone receptor signaling	51.042	135.569	15	38	10	21	14	40	10	21		Met-loss+Acetyl [N-Term]	42.87	128.76	58.164	188.991	25	46	15	29	18	43	15	29		Met-loss+Acetyl [N-Term]	51.17	139.28
P49321	Nuclear autoantigenic sperm protein	Homo sapiens	NASP	cell organization and biogenesis;cell proliferation;metabolic process;response to stimulus;transport	cytoplasm;nucleus	protein binding			82.74	130.469	31	32	16	18	20	46	16	18			68.9	157.26	52.887	174.259	23	33	9	18	14	40	9	18			46.31	150.06
P49748	Very long-chain specific acyl-CoA dehydrogenase, mitochondrial	Homo sapiens	ACADVL	cell differentiation;metabolic process;regulation of biological process;response to stimulus	cytosol;membrane;mitochondrion;nucleus;organelle lumen	catalytic activity;nucleotide binding	Fatty acid degradation; Metabolic pathways; Fatty acid metabolism	Beta oxidation of palmitoyl-CoA to myristoyl-CoA; XBP1(S) activates chaperone genes	93.11	156.591	33	45	18	25	33	52	18	25			109.04	169.72	92.81	79.158	37	33	20	17	36	18	20	17			113.86	57.61
P51114	Fragile X mental retardation syndrome-related protein 1	Homo sapiens	FXR1	cell death;cell differentiation;development;regulation of biological process	cytoplasm;cytosol;membrane;nucleus	protein binding;RNA binding	RNA transport	Signaling by BRAF and RAF fusions	59.391	73.27	32	32	14	16	21	34	12	14	Met-loss+Acetyl [N-Term]	Met-loss+Acetyl [N-Term]	65.48	105.13	67.484	129.993	34	39	16	20	42	53	13	18	Met-loss+Acetyl [N-Term]		118.59	171.73
P51665	26S proteasome non-ATPase regulatory subunit 7	Homo sapiens	PSMD7	metabolic process;regulation of biological process;response to stimulus;transport	cytosol;extracellular;membrane;nucleus;organelle lumen;proteasome	catalytic activity;protein binding	Epstein-Barr virus infection; Proteasome	Regulation of RAS by GAPs; CDT1 association with the CDC6:ORC:origin complex; Downstream TCR signaling; UCH proteinases; NIK-->noncanonical NF-kB signaling; Hh mutants that don't undergo autocatalytic processing are degraded by ERAD; SCF-beta-TrCP mediated degradation of Emi1; Neutrophil degranulation; Cross-presentation of soluble exogenous antigens (endosomes); Separation of Sister Chromatids; …	76.798	102.069	44	48	11	14	14	32	11	14	Met-loss [N-Term]	Met-loss [N-Term]	54.5	107.02	91.211	137.805	45	45	12	14	19	24	12	14	Met-loss [N-Term]	Met-loss [N-Term]	70.98	87.41
P52294	Importin subunit alpha-5	Homo sapiens	KPNA1	metabolic process;regulation of biological process;transport	cytoplasm;cytosol;nucleus	protein binding;transporter activity	Influenza A	Integration of provirus; ISG15 antiviral mechanism; NS1 Mediated Effects on Host Pathways; Vpr-mediated nuclear import of PICs; Transport of Ribonucleoproteins into the Host Nucleus; Activation of DNA fragmentation factor	57.668	65.861	21	22	10	10	13	22	6	5		Met-loss+Acetyl [N-Term]	48.58	61.98	51.172	107.13	19	30	9	14	16	29	5	6	Met-loss+Acetyl [N-Term]	Met-loss+Acetyl [N-Term]	52.87	92.54
P52594	Arf-GAP domain and FG repeat-containing protein 1	Homo sapiens	AGFG1	cell differentiation;cell organization and biogenesis;development;regulation of biological process;transport	cytosol;nucleus	DNA binding;enzyme regulator activity;metal ion binding;protein binding;RNA binding	Influenza A	Cargo recognition for clathrin-mediated endocytosis	55.049	123.94	30	33	9	12	17	54	9	10			61.21	187.17	81.188	157.208	30	31	8	12	17	58	8	11			66.1	237.32
P52597	Heterogeneous nuclear ribonucleoprotein F	Homo sapiens	HNRNPF	metabolic process;regulation of biological process;response to stimulus	cytosol;membrane;nucleus;spliceosomal complex	protein binding;RNA binding		Gene and protein expression by JAK-STAT signaling after Interleukin-12 stimulation; mRNA Splicing - Major Pathway; FGFR2 alternative splicing; Interleukin-12 family signaling	69.838	148.396	39	50	10	13	21	69	9	11	Met-loss+Acetyl [N-Term]	Met-loss+Acetyl [N-Term]	63.45	221.4	50.932	121.848	35	48	10	13	25	51	8	11	Met-loss+Acetyl [N-Term]	Met-loss+Acetyl [N-Term]	70.11	171.14
P54136	Arginine--tRNA ligase, cytoplasmic	Homo sapiens	RARS1	metabolic process	cytoplasm;cytosol;membrane;mitochondrion;nucleus	catalytic activity;nucleotide binding;protein binding;RNA binding	Aminoacyl-tRNA biosynthesis	Cytosolic tRNA aminoacylation; SeMet incorporation into proteins	102.881	188.415	39	49	24	32	30	76	24	32			89.64	230.31	106.005	159.79	39	46	23	30	42	49	23	30			123.66	150.8
P54619	5'-AMP-activated protein kinase subunit gamma-1	Homo sapiens	PRKAG1	cell communication;metabolic process;regulation of biological process;response to stimulus;transport	cytosol;membrane;nucleus	catalytic activity;enzyme regulator activity;nucleotide binding;protein binding	Longevity regulating pathway - multiple species; Insulin signaling pathway; FoxO signaling pathway; Oxytocin signaling pathway; Glucagon signaling pathway; AMPK signaling pathway; Non-alcoholic fatty liver disease (NAFLD); Circadian rhythm; Insulin resistance; Adipocytokine signaling pathway; Longevity regulating pathway; Hypertrophic cardiomyopathy (HCM)	Translocation of GLUT4 to the plasma membrane; Energy dependent regulation of mTOR by LKB1-AMPK; TP53 Regulates Metabolic Genes; Regulation of TP53 Activity through Phosphorylation; Macroautophagy; Activation of PPARGC1A (PGC-1alpha) by phosphorylation	89.077	50.125	45	35	15	12	17	13	15	12			62.86	36.75	72.126	77.042	44	44	15	16	17	19	15	16			55.16	57.62
P55786	Puromycin-sensitive aminopeptidase	Homo sapiens	NPPS	metabolic process;response to stimulus	cytoplasm;cytosol;nucleus	catalytic activity;metal ion binding		Antigen processing: Ubiquitination & Proteasome degradation	57.13	139.286	18	40	14	28	16	65	14	28			44.19	194.25	58.86	133.335	17	35	14	26	16	37	14	26			44.07	114.59
P55795	Heterogeneous nuclear ribonucleoprotein H2	Homo sapiens	HNRNPH2	metabolic process	cytosol;membrane;nucleus	protein binding;RNA binding		mRNA Splicing - Major Pathway	66.821	154.536	29	48	10	17	29	76	5	10	Phospho [S104(98.1)]	Phospho [S104(97.3)]; Acetyl [N-Term]	96.05	238.76	63.317	137.223	31	44	12	15	48	68	4	9	Phospho [S104(100)]	Phospho [S104(100)]; Acetyl [N-Term]	135.98	225.2
P57772	Selenocysteine-specific elongation factor	Homo sapiens	EEFSEC	metabolic process;regulation of biological process	cytoplasm;mitochondrion;nucleus	catalytic activity;nucleotide binding;RNA binding		Selenocysteine synthesis	87.82	115.216	35	35	17	19	24	34	17	19			77.68	103.13	73.011	131.104	28	38	15	19	30	28	15	19			82.65	96.64
P60228	Eukaryotic translation initiation factor 3 subunit E	Homo sapiens	EIF3E	metabolic process;regulation of biological process	chromosome;cytoplasm;cytosol;membrane;nucleus	protein binding;RNA binding	RNA transport; Hepatitis C	Formation of the ternary complex, and subsequently, the 43S complex; L13a-mediated translational silencing of Ceruloplasmin expression; Translation initiation complex formation; GTP hydrolysis and joining of the 60S ribosomal subunit; Formation of a pool of free 40S subunits; Ribosomal scanning and start codon recognition	59.68	137.524	29	54	14	24	17	54	14	24	Met-loss+Acetyl [N-Term]	Met-loss+Acetyl [N-Term]	52.2	162.98	58.903	139.035	31	53	14	23	17	53	14	23	Met-loss+Acetyl [N-Term]	Met-loss+Acetyl [N-Term]	48.74	147.65
P62195	26S proteasome regulatory subunit 8	Homo sapiens	PSMC5	metabolic process;regulation of biological process;response to stimulus;transport	cytoplasm;cytosol;membrane;nucleus;proteasome	catalytic activity;nucleotide binding;protein binding;RNA binding	Epstein-Barr virus infection; Proteasome	Regulation of RAS by GAPs; CDT1 association with the CDC6:ORC:origin complex; Downstream TCR signaling; UCH proteinases; NIK-->noncanonical NF-kB signaling; Hh mutants that don't undergo autocatalytic processing are degraded by ERAD; SCF-beta-TrCP mediated degradation of Emi1; Cross-presentation of soluble exogenous antigens (endosomes); Separation of Sister Chromatids; Vpu mediated degradation o…	85.574	193.156	50	71	16	27	24	54	15	25		Met-loss+Acetyl [N-Term]	78.59	185.83	62.263	122.452	45	53	14	16	20	26	13	14		Met-loss+Acetyl [N-Term]	66.01	90.12
P62244	40S ribosomal protein S15a	Homo sapiens	RPS15A	cell organization and biogenesis;metabolic process;regulation of biological process;response to stimulus;transport	cytoplasm;cytosol;membrane;mitochondrion;ribosome	protein binding;RNA binding;structural molecule activity	Ribosome	Peptide chain elongation; Eukaryotic Translation Termination; Viral mRNA Translation; Formation of the ternary complex, and subsequently, the 43S complex; L13a-mediated translational silencing of Ceruloplasmin expression; Selenocysteine synthesis; Nonsense Mediated Decay (NMD) independent of the Exon Junction Complex (EJC); Nonsense Mediated Decay (NMD) enhanced by the Exon Junction Complex (EJC)…	110.488	65.304	86	64	16	13	54	27	16	13	Met-loss [N-Term]	Met-loss [N-Term]	172.36	65.82	55.217	75.519	82	79	13	14	22	22	13	14	Met-loss [N-Term]	Met-loss [N-Term]	57.49	65.15
P62258	14-3-3 protein epsilon	Homo sapiens	YWHAE	cell organization and biogenesis;cellular component movement;cellular homeostasis;metabolic process;regulation of biological process;response to stimulus;transport	cytoplasm;cytosol;membrane;mitochondrion;nucleus	protein binding;RNA binding	Viral carcinogenesis; Epstein-Barr virus infection; Neurotrophin signaling pathway; Hippo signaling pathway; Oocyte meiosis; Cell cycle; PI3K-Akt signaling pathway	Regulation of PLK1 Activity at G2/M Transition; Recruitment of NuMA to mitotic centrosomes; Loss of Nlp from mitotic centrosomes; NADE modulates death signalling; Translocation of GLUT4 to the plasma membrane; Deregulated CDK5 triggers multiple neurodegenerative pathways in Alzheimer's disease models; Chk1/Chk2(Cds1) mediated inactivation of Cyclin B:Cdk1 complex; Signaling by Hippo; AURKA Activa…	64.894	146.425	49	71	13	21	28	85	11	18	Acetyl [N-Term]	Acetyl [N-Term]	85.57	254.39	66.39	113.731	54	69	15	20	26	47	13	17	Acetyl [N-Term]	Acetyl [N-Term]	70.11	138.22
P62263	40S ribosomal protein S14	Homo sapiens	RPS14	cell differentiation;cell organization and biogenesis;metabolic process;regulation of biological process;transport	cytosol;membrane;mitochondrion;ribosome	protein binding;RNA binding;structural molecule activity;translation regulator activity	Ribosome	Peptide chain elongation; Eukaryotic Translation Termination; Viral mRNA Translation; Formation of the ternary complex, and subsequently, the 43S complex; L13a-mediated translational silencing of Ceruloplasmin expression; Selenocysteine synthesis; Nonsense Mediated Decay (NMD) independent of the Exon Junction Complex (EJC); Nonsense Mediated Decay (NMD) enhanced by the Exon Junction Complex (EJC)…	74.522	80.541	42	42	9	9	31	39	9	9			98.29	113.58	59.009	64.01	42	42	9	9	32	28	9	9			92.4	70.82
P62495	Eukaryotic peptide chain release factor subunit 1	Homo sapiens	ETF1	cell organization and biogenesis;metabolic process;regulation of biological process	cytoplasm;cytosol;nucleus	protein binding;RNA binding	mRNA surveillance pathway	Regulation of expression of SLITs and ROBOs; Nonsense Mediated Decay (NMD) independent of the Exon Junction Complex (EJC); Eukaryotic Translation Termination; Nonsense Mediated Decay (NMD) enhanced by the Exon Junction Complex (EJC)	80.229	185.715	38	53	13	25	19	69	13	25	Met-loss+Acetyl [N-Term]	Met-loss+Acetyl [N-Term]	61.52	231.87	50.466	165.296	25	51	10	23	16	45	10	23	Met-loss+Acetyl [N-Term]	Met-loss+Acetyl [N-Term]	47.84	148.24
P62888	60S ribosomal protein L30	Homo sapiens	RPL30	cell organization and biogenesis;defense response;metabolic process;response to stimulus;transport	cytosol;membrane;nucleus;ribosome	protein binding;RNA binding;structural molecule activity	Ribosome	Peptide chain elongation; Eukaryotic Translation Termination; Viral mRNA Translation; L13a-mediated translational silencing of Ceruloplasmin expression; Nonsense Mediated Decay (NMD) independent of the Exon Junction Complex (EJC); Selenocysteine synthesis; Nonsense Mediated Decay (NMD) enhanced by the Exon Junction Complex (EJC); GTP hydrolysis and joining of the 60S ribosomal subunit; Major path…	74.484	91.288	75	77	10	11	37	33	10	11			127.5	105.61	61.719	72.436	70	65	10	10	20	21	10	10			64.35	63.75
P62979	Ubiquitin-40S ribosomal protein S27a	Homo sapiens	RPS27A	cell communication;cell organization and biogenesis;cellular homeostasis;defense response;metabolic process;regulation of biological process;response to stimulus;transport	cytoplasm;cytosol;membrane;nucleus;ribosome	metal ion binding;protein binding;RNA binding;structural molecule activity	Ribosome	NOTCH1 Intracellular Domain Regulates Transcription; Activated NOTCH1 Transmits Signal to the Nucleus; Regulation of RAS by GAPs; Viral mRNA Translation; UCH proteinases; ISG15 antiviral mechanism; Regulation of PLK1 Activity at G2/M Transition; Constitutive Signaling by NOTCH1 HD+PEST Domain Mutants; Activated TLR4 signalling; Hh mutants that don't undergo autocatalytic processing are degraded b…	80.302	78.293	60	63	10	12	45	54	10	4			142.45	157.47	78.539	88.61	73	76	14	14	57	72	14	14			180.68	203.85
P63244	Receptor of activated protein C kinase 1	Homo sapiens	RACK1	cell death;cellular homeostasis;development;metabolic process;regulation of biological process;response to stimulus	cytoplasm;cytosol;membrane;mitochondrion;nucleus;ribosome	enzyme regulator activity;protein binding;RNA binding;structural molecule activity	Measles	Regulation of TNFR1 signaling; TNFR1-mediated ceramide production; TNFR1-induced NFkappaB signaling pathway	130.307	189.165	67	86	21	28	42	105	21	28	Met-loss+Acetyl [N-Term]		142.58	321.74	82.126	142.659	55	74	17	23	23	65	17	23	Met-loss+Acetyl [N-Term]	Met-loss+Acetyl [N-Term]	68.93	190.52
Q01780	Exosome component 10	Homo sapiens	EXOSC10	metabolic process;regulation of biological process	cytoplasm;cytosol;membrane;nucleus	catalytic activity;nucleotide binding;protein binding;RNA binding	RNA degradation	Major pathway of rRNA processing in the nucleolus and cytosol	124.523	172.337	35	42	25	30	33	61	25	30			108.21	188.49	61.387	138.772	29	36	16	26	18	41	16	26			55.58	132.15
Q07666	KH domain-containing, RNA-binding, signal transduction-associated protein 1	Homo sapiens	KHDRBS1	cell organization and biogenesis;cell proliferation;metabolic process;regulation of biological process;response to stimulus	cytoplasm;cytosol;membrane;nucleus	DNA binding;protein binding;RNA binding		PTK6 Regulates Proteins Involved in RNA Processing	81.909	107.815	36	35	16	16	42	69	16	14			118.15	202.66	73.774	153.473	32	37	13	17	51	91	13	17		Phospho [S58(97.2)]	138.02	284.84
Q08J23	RNA cytosine C(5)-methyltransferase NSUN2	Homo sapiens	NSUN2	cell division;metabolic process	cytoplasm;cytoskeleton;nucleus	catalytic activity;RNA binding		tRNA modification in the nucleus and cytosol	64.587	113.898	23	32	13	22	15	47	13	22			48.67	146.24	77.778	144.11	32	40	18	28	34	56	18	28			93.2	171.78
Q12789	General transcription factor 3C polypeptide 1	Homo sapiens	GTF3C1	metabolic process;regulation of biological process	membrane;nucleus	DNA binding;protein binding		RNA Polymerase III Abortive And Retractive Initiation; RNA Polymerase III Transcription Initiation From Type 1 Promoter; RNA Polymerase III Transcription Initiation From Type 2 Promoter	283.438	210.797	35	27	59	45	99	59	59	45	Phospho [S739(97.1); S1856(95.2)]		308.56	171.02	62.42	229.859	12	25	19	47	25	68	19	47			66.1	204.18
Q12996	Cleavage stimulation factor subunit 3	Homo sapiens	CSTF3	metabolic process	nucleus	protein binding;RNA binding	mRNA surveillance pathway	Cleavage of Growing Transcript in the Termination Region ; Processing of Intronless Pre-mRNAs; mRNA 3'-end processing; mRNA Splicing - Major Pathway	51.568	151.529	25	43	14	26	16	50	14	26	Met-loss+Acetyl [N-Term]; Phospho [S691(100)]	Met-loss+Acetyl [N-Term]; Phospho [S691(100)]	49.92	148.22	61.723	208.831	22	50	15	34	33	53	15	34	Met-loss+Acetyl [N-Term]	Met-loss+Acetyl [N-Term]; Phospho [S691(100)]	93.87	169.74
Q13330	Metastasis-associated protein MTA1	Homo sapiens	MTA1	cell organization and biogenesis;metabolic process;regulation of biological process;response to stimulus	cytoplasm;cytoskeleton;cytosol;nucleus	catalytic activity;DNA binding;metal ion binding;protein binding		ERCC6 (CSB) and EHMT2 (G9a) positively regulate rRNA expression; Regulation of PTEN gene transcription; SUMOylation of transcription factors; HDACs deacetylate histones; RNA Polymerase I Transcription Initiation	58.945	95.372	27	36	16	22	30	55	11	15			87.51	160.59	60.161	125.569	27	37	17	25	29	56	12	18			83.04	161.79
Q13547	Histone deacetylase 1	Homo sapiens	HDAC1	cell differentiation;cell organization and biogenesis;coagulation;metabolic process;regulation of biological process	chromosome;cytoplasm;cytosol;nucleus	catalytic activity;DNA binding;metal ion binding;protein binding	Viral carcinogenesis; Longevity regulating pathway - multiple species; MicroRNAs in cancer; Amphetamine addiction; Chronic myeloid leukemia; Epstein-Barr virus infection; Huntington's disease; Pathways in cancer; Thyroid hormone signaling pathway; Transcriptional misregulation in cancer; Notch signaling pathway; Alcoholism; Cell cycle	NOTCH1 Intracellular Domain Regulates Transcription; NoRC negatively regulates rRNA expression; Constitutive Signaling by NOTCH1 HD+PEST Domain Mutants; Factors involved in megakaryocyte development and platelet production; SMAD2/SMAD3:SMAD4 heterotrimer regulates transcription; Downregulation of SMAD2/3:SMAD4 transcriptional activity; Activation of E2F1 target genes at G1/S; HDACs deacetylate hi…	86.45	122.068	33	36	14	14	31	55	9	8		Phospho [S393(100)]	92.69	157.45	86.903	150.724	33	51	14	20	38	71	9	12		Phospho [S393(100)]	109.11	215.94
Q13557	Calcium/calmodulin-dependent protein kinase type II subunit delta	Homo sapiens	CAMK2D	cell differentiation;cell organization and biogenesis;cellular component movement;cellular homeostasis;metabolic process;regulation of biological process;response to stimulus	cytoplasm;cytosol;endoplasmic reticulum;membrane;nucleus	catalytic activity;nucleotide binding;protein binding	Dopaminergic synapse; HIF-1 signaling pathway; Amphetamine addiction; Neurotrophin signaling pathway; Oxytocin signaling pathway; Olfactory transduction; Circadian entrainment; ErbB signaling pathway; Long-term potentiation; Insulin secretion; Glioma; Adrenergic signaling in cardiomyocytes; Tuberculosis; Glucagon signaling pathway; Melanogenesis; Wnt signaling pathway; Proteoglycans in cancer; Al…	Ion homeostasis; HSF1-dependent transactivation; Interferon gamma signaling; Phase 0 - rapid depolarisation; Ras activation uopn Ca2+ infux through NMDA receptor; Ion transport by P-type ATPases; Unblocking of NMDA receptor, glutamate binding and activation; Trafficking of AMPA receptors; CREB phosphorylation through the activation of CaMKII; RAF/MAP kinase cascade; Interleukin-20 family signaling	60.672	136.627	29	38	11	17	15	53	9	14	Phospho [T337(99.4)]	Phospho [T337(99.1)]	50.1	170.22	85.383	156.807	36	44	15	22	36	56	9	17		Phospho [T337(98.7)]	118.38	181
Q13620	Cullin-4B	Homo sapiens	CUL4B	cell organization and biogenesis;metabolic process;regulation of biological process;response to stimulus	cytosol;nucleus	catalytic activity;DNA binding;protein binding	Ubiquitin mediated proteolysis; Nucleotide excision repair	Formation of Incision Complex in GG-NER; DNA Damage Recognition in GG-NER; Gap-filling DNA repair synthesis and ligation in TC-NER; Recognition of DNA damage by PCNA-containing replication complex; Dual incision in TC-NER; Formation of TC-NER Pre-Incision Complex; Dual Incision in GG-NER; Neddylation	63.863	105.348	19	30	16	29	30	40	10	16			85.5	101.59	51.108	110.063	20	33	16	28	29	48	10	20			80.35	131.56
Q13867	Bleomycin hydrolase	Homo sapiens	BLMH	metabolic process;response to stimulus	cytoplasm;cytosol;nucleus	catalytic activity;protein binding		Antigen processing: Ubiquitination & Proteasome degradation	56.965	242.305	27	60	11	27	28	80	11	27	Met-loss+Acetyl [N-Term]	Met-loss+Acetyl [N-Term]	86.58	255.49	67.179	83.529	33	35	11	14	36	42	11	14	Met-loss+Acetyl [N-Term]	Met-loss+Acetyl [N-Term]	113.69	132.15
Q14694	Ubiquitin carboxyl-terminal hydrolase 10	Homo sapiens	USP10	metabolic process;regulation of biological process;response to stimulus	cytoplasm;cytosol;endosome;nucleus	catalytic activity;protein binding;RNA binding		Termination of translesion DNA synthesis; Ub-specific processing proteases	96.668	106.077	38	33	21	20	44	68	21	20	Phospho [S576(100)]		133.74	206.59	65.359	117.919	29	34	15	19	28	40	15	19		Phospho [S576(100)]	83.35	123.81
Q15418	Ribosomal protein S6 kinase alpha-1	Homo sapiens	RPS6KA1	cell death;cell proliferation;metabolic process;regulation of biological process;response to stimulus	cytoplasm;cytosol;membrane;nucleus	catalytic activity;enzyme regulator activity;metal ion binding;nucleotide binding;protein binding	Neurotrophin signaling pathway; Progesterone-mediated oocyte maturation; MAPK signaling pathway; Long-term potentiation; mTOR signaling pathway; Oocyte meiosis; Insulin resistance	CREB phosphorylation; ERK/MAPK targets; Recycling pathway of L1; Activated TLR4 signalling; Signaling by GPCR; Gastrin-CREB signalling pathway via PKC and MAPK; Senescence-Associated Secretory Phenotype (SASP); RSK activation	58.76	127.133	20	35	10	22	14	46	7	15			47.04	132.12	84.541	197.613	30	56	17	31	25	63	11	21		Phospho [S221(100)]; Met-loss [N-Term]	78.43	190.12
Q15542	Transcription initiation factor TFIID subunit 5	Homo sapiens	TAF5	cell organization and biogenesis;metabolic process;regulation of biological process	cytoskeleton;nucleus	catalytic activity;DNA binding;protein binding	Basal transcription factors; Herpes simplex infection	RNA polymerase II transcribes snRNA genes; RNA Polymerase II Transcription Initiation; HIV Transcription Initiation; RNA Polymerase II Transcription Pre-Initiation And Promoter Opening; RNA Polymerase II HIV Promoter Escape; Regulation of TP53 Activity through Phosphorylation; RNA Polymerase II Pre-transcription Events; RNA Polymerase II Promoter Escape	66.493	102.457	30	39	17	21	19	27	17	21		Met-loss+Acetyl [N-Term]	60.54	79.69	58.043	107.504	22	35	13	20	16	39	13	20	Met-loss+Acetyl [N-Term]	Met-loss+Acetyl [N-Term]	38.12	117.19
Q3LXA3	Triokinase/FMN cyclase	Homo sapiens	TKFC	defense response;metabolic process;regulation of biological process;response to stimulus	cytosol;nucleus	catalytic activity;metal ion binding;nucleotide binding;protein binding	Carbon metabolism; Glycerolipid metabolism; Fructose and mannose metabolism; RIG-I-like receptor signaling pathway; Metabolic pathways	Fructose catabolism; DDX58/IFIH1-mediated induction of interferon-alpha/beta	161.13	193.856	50	47	22	22	36	86	22	22			131.37	282.59	57.827	86.534	24	33	11	14	15	16	11	14			49.29	56.02
Q53GS9	U4/U6.U5 tri-snRNP-associated protein 2	Homo sapiens	USP39	cell division;cell organization and biogenesis;metabolic process	nucleus;spliceosomal complex	catalytic activity;metal ion binding	Spliceosome	mRNA Splicing - Major Pathway	54.828	110.001	29	40	13	21	19	51	13	21			60.99	152.72	56.475	107.513	24	43	10	22	21	42	10	22			67.26	125.57
Q5T1M5	FK506-binding protein 15	Homo sapiens	FKBP15	cell differentiation;cell organization and biogenesis;cellular component movement;metabolic process;regulation of biological process;transport	cytoplasm;cytoskeleton;endosome;extracellular;Golgi;membrane;nucleus	catalytic activity;motor activity;protein binding;structural molecule activity;transporter activity			63.731	110.06	19	18	15	14	23	23	15	14		Phospho [S960(85.5)]	74.13	80.85	82.206	102.695	20	20	16	15	21	27	16	15			68.6	100.47
Q5UIP0	Telomere-associated protein RIF1	Homo sapiens	RIF1	cell organization and biogenesis;metabolic process;regulation of biological process;response to stimulus	chromosome;cytoplasm;cytoskeleton;membrane;nucleus	protein binding	Signaling pathways regulating pluripotency of stem cells	Nonhomologous End-Joining (NHEJ)	251.483	154.875	27	17	53	31	122	54	53	31			364.13	149.81	54.731	158.514	7	18	14	31	25	56	14	31			64.97	162.82
Q5VYK3	Proteasome adapter and scaffold protein ECM29	Homo sapiens	ECPAS	cell organization and biogenesis;metabolic process	cytoplasm;cytoskeleton;endoplasmic reticulum;endosome;membrane;nucleus;proteasome	protein binding;structural molecule activity			59.061	295.967	13	36	17	57	18	80	17	57		Met-loss+Acetyl [N-Term]	54.79	220.76	69.831	254.309	16	33	21	49	27	69	21	49		Met-loss+Acetyl [N-Term]	73.61	205.19
Q68E01	Integrator complex subunit 3	Homo sapiens	INTS3	metabolic process;regulation of biological process;response to stimulus	cytoplasm;nucleus	protein binding		RNA polymerase II transcribes snRNA genes	84.906	71.847	18	12	17	9	23	15	17	9			77.07	53.86	102.526	125.865	17	24	15	22	29	31	15	22			100.58	99.2
Q68EM7	Rho GTPase-activating protein 17	Homo sapiens	ARHGAP17	regulation of biological process;response to stimulus	cytoplasm;cytosol;membrane;nucleus	enzyme regulator activity;protein binding		Rho GTPase cycle	160.378	79.5	38	21	22	16	77	36	22	15	Phospho [S575(100)]		251.02	115.14	69.285	79.049	27	23	14	14	34	26	14	14	Phospho [S575(90.9); T679(97.4)]	Phospho [S575(100)]	95.92	88.19
Q7Z5K2	Wings apart-like protein homolog	Homo sapiens	WAPL	cell division;cell organization and biogenesis;regulation of biological process;response to stimulus	chromosome;cytoplasm;cytosol;nucleus	protein binding		Cohesin Loading onto Chromatin; Establishment of Sister Chromatid Cohesion; Separation of Sister Chromatids; Resolution of Sister Chromatid Cohesion	149.758	66.905	35	15	31	13	78	28	31	13	Phospho [S77(100); S221(99.1)]		237.14	82.59	77.171	143.945	17	27	16	24	37	49	16	24	Phospho [S221(99.9)]		105.29	158.07
Q7Z5L9	Interferon regulatory factor 2-binding protein 2	Homo sapiens	IRF2BP2	metabolic process;regulation of biological process	cytoplasm;nucleus	metal ion binding			57.462	86.225	24	27	9	11	23	51	8	11	Met-loss+Acetyl [N-Term]	Met-loss+Acetyl [N-Term]	77.42	181.3	68.074	119.314	39	36	13	16	40	54	12	16	Met-loss+Acetyl [N-Term]	Met-loss+Acetyl [N-Term]	134	190.01
Q86V81	THO complex subunit 4	Homo sapiens	ALYREF	cell differentiation;metabolic process;regulation of biological process;response to stimulus;transport	cytoplasm;cytosol;membrane;nucleus;spliceosomal complex	protein binding;RNA binding	Spliceosome; mRNA surveillance pathway; RNA transport; Herpes simplex infection	mRNA 3'-end processing; Transport of Mature mRNA Derived from an Intronless Transcript; mRNA Splicing - Major Pathway; Transport of the SLBP Dependant Mature mRNA; Cleavage of Growing Transcript in the Termination Region ; Transport of Mature mRNA derived from an Intron-Containing Transcript; Transport of the SLBP independent Mature mRNA	81.609	65.003	48	40	9	9	29	34	9	9	Met-loss+Acetyl [N-Term]		99.41	107.8	74.832	69.698	48	38	9	7	21	24	9	7	Met-loss+Acetyl [N-Term]		70.72	89.36
Q86YP4	Transcriptional repressor p66-alpha	Homo sapiens	GATAD2A	metabolic process;regulation of biological process	nucleus	DNA binding;metal ion binding;protein binding		ERCC6 (CSB) and EHMT2 (G9a) positively regulate rRNA expression; Regulation of TP53 Activity through Acetylation; Regulation of PTEN gene transcription; HDACs deacetylate histones; RNA Polymerase I Transcription Initiation	80.268	126.408	41	51	17	23	35	49	16	21			103.86	148.18	110.274	150.255	48	52	22	24	57	65	21	22	Phospho [T175(100); T186(81)]	Phospho [T175(100); S185(78.1); T189(82)]	166.34	205.74
Q8N1F7	Nuclear pore complex protein Nup93	Homo sapiens	NUP93	cell organization and biogenesis;cellular component movement;metabolic process;regulation of biological process;response to stimulus;transport	membrane;nucleus	protein binding;structural molecule activity	RNA transport	Rev-mediated nuclear export of HIV RNA; ISG15 antiviral mechanism; NEP/NS2 Interacts with the Cellular Export Machinery; tRNA processing in the nucleus; Transcriptional regulation by small RNAs; Nuclear Pore Complex (NPC) Disassembly; Regulation of Glucokinase by Glucokinase Regulatory Protein; Vpr-mediated nuclear import of PICs; Regulation of HSF1-mediated heat shock response; snRNP Assembly; S…	63.402	102.677	29	30	19	22	21	29	19	22			60.38	86.98	59.039	111.632	24	40	17	26	21	32	17	26			57.48	98.54
Q8WUA4	General transcription factor 3C polypeptide 2	Homo sapiens	GTF3C2	metabolic process	nucleus	DNA binding;protein binding		RNA Polymerase III Abortive And Retractive Initiation; RNA Polymerase III Transcription Initiation From Type 1 Promoter; RNA Polymerase III Transcription Initiation From Type 2 Promoter	116.41	57.612	34	24	23	16	45	24	23	16			136.18	65.68	70.224	97.435	27	30	18	22	34	39	18	22			85.42	96.25
Q8WVV9	Heterogeneous nuclear ribonucleoprotein L-like	Homo sapiens	HNRNPLL	metabolic process;regulation of biological process	membrane;nucleus	protein binding;RNA binding			141.909	169.38	54	58	21	22	55	60	20	21			174.43	178.3	56.047	123.352	28	45	14	17	27	34	13	16			76.65	105.54
Q8WWM7	Ataxin-2-like protein	Homo sapiens	ATXN2L	cell organization and biogenesis;regulation of biological process	cytoplasm;cytosol;membrane;nucleus	protein binding;RNA binding			62.248	132.2	19	32	15	29	31	74	15	28			83.48	208.26	65.412	98.407	24	27	20	23	44	53	18	23			110.13	141.37
Q8WX92	Negative elongation factor B	Homo sapiens	NELFB	metabolic process;regulation of biological process	cytoplasm;nucleus	protein binding;RNA binding		HIV elongation arrest and recovery; Formation of the HIV-1 Early Elongation Complex; Abortive elongation of HIV-1 transcript in the absence of Tat; TP53 Regulates Transcription of DNA Repair Genes; Tat-mediated HIV elongation arrest and recovery; Formation of RNA Pol II elongation complex ; Formation of HIV elongation complex in the absence of HIV Tat; RNA Polymerase II Pre-transcription Events; …	87.24	151.951	28	38	18	25	26	44	18	25			68.27	143.75	81.636	150.034	29	39	18	24	33	46	18	24			94.87	134.37
Q92598	Heat shock protein 105 kDa	Homo sapiens	HSPH1	metabolic process;regulation of biological process;response to stimulus;transport	cytoplasm;cytosol;extracellular;nucleus;organelle lumen	enzyme regulator activity;nucleotide binding;protein binding	Protein processing in endoplasmic reticulum	Scavenging by Class F Receptors; Regulation of HSF1-mediated heat shock response	80.41	97.065	24	30	17	20	23	26	14	18			76.78	86.21	82.07	130.231	20	32	15	21	22	28	14	19		Met-loss+Acetyl [N-Term]	63.93	96.95
Q92769	Histone deacetylase 2	Homo sapiens	HDAC2	cell differentiation;cell organization and biogenesis;coagulation;metabolic process;regulation of biological process;response to stimulus	chromosome;cytoplasm;nucleus	catalytic activity;DNA binding;protein binding;RNA binding	Viral carcinogenesis; Longevity regulating pathway - multiple species; Chronic myeloid leukemia; Epstein-Barr virus infection; Huntington's disease; Pathways in cancer; Thyroid hormone signaling pathway; Transcriptional misregulation in cancer; Notch signaling pathway; Alcoholism; Cell cycle	NOTCH1 Intracellular Domain Regulates Transcription; Regulation of TP53 Activity through Acetylation; NoRC negatively regulates rRNA expression; Constitutive Signaling by NOTCH1 HD+PEST Domain Mutants; Factors involved in megakaryocyte development and platelet production; SUMOylation of chromatin organization proteins; ERCC6 (CSB) and EHMT2 (G9a) positively regulate rRNA expression; Regulation of…	70.247	94.214	30	29	12	12	20	56	7	6	Met-loss+Acetyl [N-Term]	Met-loss+Acetyl [N-Term]	63.19	156.37	50.189	98.323	30	34	11	15	22	58	6	7	Met-loss+Acetyl [N-Term]; Phospho [S394(100)]		61.59	168.08
Q92797	Symplekin	Homo sapiens	SYMPK	metabolic process;regulation of biological process;transport	cytoplasm;cytoskeleton;cytosol;membrane;nucleus	protein binding	Tight junction; mRNA surveillance pathway	mRNA 3'-end processing; Transport of Mature mRNA Derived from an Intronless Transcript; mRNA Splicing - Major Pathway; Cleavage of Growing Transcript in the Termination Region ; Processing of Intronless Pre-mRNAs	128.973	68.567	22	14	26	14	42	27	26	14	Met-loss+Acetyl [N-Term]		117.06	85.22	105.28	250.081	21	39	23	39	42	82	23	39		Met-loss+Acetyl [N-Term]	115.73	277.03
Q92925	SWI/SNF-related matrix-associated actin-dependent regulator of chromatin subfamily D member 2	Homo sapiens	SMARCD2	cell organization and biogenesis;metabolic process;regulation of biological process	nucleus	DNA binding;protein binding		RUNX1 interacts with co-factors whose precise effect on RUNX1 targets is not known; RMTs methylate histone arginines	111.61	136.409	44	47	22	22	29	45	21	20	Phospho [Y311(99.9)]		91.02	148.55	87.496	142.232	38	45	16	19	23	29	14	16			76.73	105.56
Q92973	Transportin-1	Homo sapiens	TNPO1	cellular component movement;regulation of biological process;transport	cytoplasm;cytosol;membrane;nucleus	protein binding;RNA binding;transporter activity		Tristetraprolin (TTP, ZFP36) binds and destabilizes mRNA; Intraflagellar transport	97.231	105.918	27	33	19	24	31	51	15	19			97.09	147.16	62.029	121.907	22	34	14	24	24	47	11	20			68.41	138.3
Q93009	Ubiquitin carboxyl-terminal hydrolase 7	Homo sapiens	USP7	cell organization and biogenesis;development;metabolic process;regulation of biological process;response to stimulus	chromosome;cytoplasm;cytosol;nucleus	catalytic activity;protein binding	Viral carcinogenesis; FoxO signaling pathway; Epstein-Barr virus infection; Herpes simplex infection	Synthesis of active ubiquitin: roles of E1 and E2 enzymes; Ub-specific processing proteases; Gap-filling DNA repair synthesis and ligation in TC-NER; Regulation of TP53 Degradation; Dual incision in TC-NER; Formation of TC-NER Pre-Incision Complex; Regulation of PTEN localization	195.474	219.311	41	41	35	35	64	79	35	35			186.29	234.62	60.466	105.115	22	26	20	22	22	35	20	22			52.48	96.05
Q96DI7	U5 small nuclear ribonucleoprotein 40 kDa protein	Homo sapiens	SNRNP40	cell organization and biogenesis;metabolic process	cytosol;nucleus;spliceosomal complex	protein binding;RNA binding	Spliceosome	mRNA Splicing - Major Pathway; mRNA Splicing - Minor Pathway	58.236	93.163	40	46	8	12	12	18	8	12			49.72	73.15	114.359	109.794	47	49	12	12	18	22	12	12			74.24	82.47
Q96P16	Regulation of nuclear pre-mRNA domain-containing protein 1A	Homo sapiens	RPRD1A	metabolic process;regulation of biological process		protein binding		RNA polymerase II transcribes snRNA genes	52.188	96.302	37	49	10	14	11	18	8	11	Met-loss+Acetyl [N-Term]	Met-loss+Acetyl [N-Term]	35.73	62.42	61.517	106.307	36	63	10	16	12	22	7	12	Met-loss+Acetyl [N-Term]	Met-loss+Acetyl [N-Term]; Phospho [S156(80.4)]	41.14	78.27
Q96PU8	Protein quaking	Homo sapiens	QKI	cell differentiation;development;metabolic process;regulation of biological process;transport	cytoplasm;nucleus	protein binding;RNA binding		Signaling by BRAF and RAF fusions	50.27	129.256	34	58	10	20	23	38	10	20			72.33	119.24	71.8	145.602	54	54	14	17	38	57	14	17			110.9	186.18
Q99541	Perilipin-2	Homo sapiens	PLIN2	regulation of biological process;response to stimulus;transport	cytoplasm;cytosol;endoplasmic reticulum;extracellular;membrane;nucleus		PPAR signaling pathway	PPARA activates gene expression	116.312	136.997	59	62	21	22	54	67	21	22	Met-loss+Acetyl [N-Term]	Met-loss+Acetyl [N-Term]	168.72	206.88	80.345	107.434	50	60	16	17	69	46	16	17	Met-loss+Acetyl [N-Term]	Met-loss+Acetyl [N-Term]	190.98	152.69
Q99959	Plakophilin-2	Homo sapiens	PKP2	cell communication;cell death;cell organization and biogenesis;regulation of biological process	cytoskeleton;membrane;nucleus	protein binding;structural molecule activity	Arrhythmogenic right ventricular cardiomyopathy (ARVC)	Formation of the cornified envelope	58.618	63.63	25	25	19	16	30	28	19	16	Met-loss+Acetyl [N-Term]	Met-loss+Acetyl [N-Term]	78.86	82.86	51.233	75.846	22	28	16	16	31	24	16	16		Met-loss+Acetyl [N-Term]	76.56	71.32
Q9BPX3	Condensin complex subunit 3	Homo sapiens	NCAPG	cell division;cell organization and biogenesis;metabolic process	chromosome;cytoplasm;cytosol;membrane;nucleus	protein binding		Condensation of Prometaphase Chromosomes	92.447	52.362	25	14	18	13	36	19	18	13	Phospho [S674(99.9)]	Phospho [T709(100)]	118.76	58.85	90.653	133.276	26	26	20	23	41	40	20	23	Phospho [S674(100)]		117.4	122.4
Q9BZK7	F-box-like/WD repeat-containing protein TBL1XR1	Homo sapiens	TBL1XR1	cell differentiation;cell organization and biogenesis;metabolic process;regulation of biological process;response to stimulus	nucleus	DNA binding;protein binding	Wnt signaling pathway	NOTCH1 Intracellular Domain Regulates Transcription; Transcriptional regulation of white adipocyte differentiation; Activation of gene expression by SREBF (SREBP); RORA activates gene expression; Constitutive Signaling by NOTCH1 HD+PEST Domain Mutants; PPARA activates gene expression; YAP1- and WWTR1 (TAZ)-stimulated gene expression; Constitutive Signaling by NOTCH1 PEST Domain Mutants; HDACs dea…	63.607	127.486	20	47	9	18	12	27	4	13			43.48	98.72	79.657	139.911	33	45	13	17	18	27	9	12			63.95	98.55
Q9H2P0	Activity-dependent neuroprotector homeobox protein	Homo sapiens	ADNP	cell communication;metabolic process;regulation of biological process;response to stimulus	cytoplasm;nucleus	DNA binding;metal ion binding;protein binding			135.605	129.389	36	29	30	26	55	77	30	26			162.61	230.29	61.904	139.27	22	30	17	26	30	70	17	26			84.12	216.49
Q9H9A5	CCR4-NOT transcription complex subunit 10	Homo sapiens	CNOT10	metabolic process;regulation of biological process;response to stimulus	cytoplasm;cytosol;membrane;nucleus	protein binding	RNA degradation	TP53 regulates transcription of additional cell cycle genes whose exact role in the p53 pathway remain uncertain; Deadenylation of mRNA	165.014	73.338	41	28	27	15	69	26	27	15	Met-loss+Acetyl [N-Term]; Met-loss [N-Term]	Met-loss [N-Term]; Met-loss+Acetyl [N-Term]	229.11	77.63	64.604	75.455	26	32	15	19	25	21	15	19	Met-loss+Acetyl [N-Term]	Met-loss+Acetyl [N-Term]	75.83	62.13
Q9HB71	Calcyclin-binding protein	Homo sapiens	CACYBP	cell differentiation;regulation of biological process;response to stimulus	cytoplasm;cytosol;nucleus	protein binding	Wnt signaling pathway		85.798	104.078	61	74	15	18	21	33	15	18	Met-loss+Acetyl [N-Term]	Met-loss+Acetyl [N-Term]	69.27	103.21	104.734	85.954	75	52	16	15	24	23	16	15	Met-loss+Acetyl [N-Term]	Met-loss+Acetyl [N-Term]	86.12	74.54
Q9HCS7	Pre-mRNA-splicing factor SYF1	Homo sapiens	XAB2	cell organization and biogenesis;metabolic process;response to stimulus	membrane;nucleus;spliceosomal complex	protein binding	Spliceosome	Dual incision in TC-NER; Formation of TC-NER Pre-Incision Complex; mRNA Splicing - Major Pathway; Gap-filling DNA repair synthesis and ligation in TC-NER	59.008	88.809	23	29	20	20	22	25	20	20			53.77	68.64	58.853	108.873	23	33	17	26	24	44	17	26			51.11	121.08
Q9NPF5	DNA methyltransferase 1-associated protein 1	Homo sapiens	DMAP1	cell organization and biogenesis;metabolic process;regulation of biological process;response to stimulus	cytoplasm;cytosol;nucleus	protein binding		HATs acetylate histones	79.165	59.346	48	36	17	12	19	19	17	12			65.79	52.79	59.908	89.04	44	39	15	14	17	19	15	14			47.35	62.04
Q9NQG5	Regulation of nuclear pre-mRNA domain-containing protein 1B	Homo sapiens	RPRD1B	metabolic process;regulation of biological process	cytosol;nucleus	protein binding		RNA polymerase II transcribes snRNA genes	59.333	120.75	45	54	11	17	12	31	9	14	Met-loss+Acetyl [N-Term]	Met-loss+Acetyl [N-Term]	40.48	104.22	66.153	107.924	42	49	11	16	15	23	8	12		Met-loss+Acetyl [N-Term]	52.69	80.51
Q9NTI5	Sister chromatid cohesion protein PDS5 homolog B	Homo sapiens	PDS5B	cell division;cell organization and biogenesis;cell proliferation;metabolic process;regulation of biological process;response to stimulus	chromosome;cytosol;nucleus	DNA binding;nucleotide binding;protein binding		Cohesin Loading onto Chromatin; Establishment of Sister Chromatid Cohesion; Separation of Sister Chromatids; Resolution of Sister Chromatid Cohesion	94.406	110.915	17	18	20	23	38	41	17	20	Phospho [S1358(100)]		104.46	120.49	52.896	177.934	11	26	13	37	20	65	12	33			50.23	189.37
Q9NUQ6	SPATS2-like protein	Homo sapiens	SPATS2L		cytoplasm;cytosol;nucleus	protein binding;RNA binding			77.619	55.9	35	26	15	11	47	20	14	11	Met-loss+Acetyl [N-Term]	Met-loss+Acetyl [N-Term]	141.43	62.22	55.45	52.896	23	16	11	7	27	14	10	7	Met-loss+Acetyl [N-Term]	Met-loss+Acetyl [N-Term]	75.84	44.03
Q9NVP1	ATP-dependent RNA helicase DDX18	Homo sapiens	DDX18	metabolic process;response to stimulus	chromosome;cytoplasm;membrane;nucleus	catalytic activity;DNA binding;nucleotide binding;protein binding;RNA binding			77.105	54.07	31	22	15	11	19	20	15	11			68.19	57.51	54.176	76.713	24	31	12	16	23	28	12	16			67.13	77.38
Q9UBC2	Epidermal growth factor receptor substrate 15-like 1	Homo sapiens	EPS15L1	cell differentiation;cell organization and biogenesis;cellular component movement;metabolic process;regulation of biological process;response to stimulus;transport	cytoplasm;cytoskeleton;cytosol;Golgi;membrane;nucleus	catalytic activity;metal ion binding;motor activity;nucleotide binding;protein binding;structural molecule activity;transporter activity	Endocytosis	Cargo recognition for clathrin-mediated endocytosis; EGFR downregulation	76.388	107.264	25	36	18	24	29	40	18	24		Phospho [T106(81.7)]	87	115.12	69.439	108.055	30	36	19	25	32	37	19	25	Phospho [S255(99.6)]		89.81	108.95
Q9UBD5	Origin recognition complex subunit 3	Homo sapiens	ORC3	cell organization and biogenesis;cell proliferation;metabolic process	nucleus	DNA binding;protein binding	Cell cycle	M/G1 Transition; CDT1 association with the CDC6:ORC:origin complex; Regulation of DNA replication; Activation of ATR in response to replication stress; Activation of the pre-replicative complex; CDC6 association with the ORC:origin complex; Association of licensing factors with the pre-replicative complex; E2F-enabled inhibition of pre-replication complex formation; Assembly of the ORC complex at…	88.895	83.121	32	27	20	17	35	32	20	17			103.11	89.74	50.046	139.908	18	38	10	22	20	43	10	22			55.76	131.85
Q9UBT2	SUMO-activating enzyme subunit 2	Homo sapiens	UBA2	metabolic process;regulation of biological process	cytoplasm;nucleus	catalytic activity;enzyme regulator activity;metal ion binding;nucleotide binding;protein binding	Ubiquitin mediated proteolysis	SUMO is conjugated to E1 (UBA2:SAE1); SUMO is transferred from E1 to E2 (UBE2I, UBC9)	84.518	145.425	43	43	18	22	25	53	18	22			76.42	157.88	83.121	117.45	42	41	20	21	26	59	20	21			74.61	193.92
Q9UHX1	Poly(U)-binding-splicing factor PUF60	Homo sapiens	PUF60	cell death;cellular homeostasis;metabolic process;regulation of biological process	nucleus	catalytic activity;DNA binding;protein binding;RNA binding	Spliceosome	mRNA Splicing - Major Pathway	56.401	108.4	27	43	11	17	12	40	11	17			43.61	132.17	83.597	159.791	31	52	13	23	29	57	13	23		Met-loss+Acetyl [N-Term]	101.92	188.98
Q9UQ80	Proliferation-associated protein 2G4	Homo sapiens	PA2G4	cell proliferation;metabolic process;regulation of biological process;transport	cytoplasm;extracellular;membrane;nucleus;organelle lumen	DNA binding;protein binding;RNA binding		Neutrophil degranulation	83.354	199.508	51	70	16	27	20	82	16	27	Met-loss+Acetyl [N-Term]	Met-loss+Acetyl [N-Term]	66.98	257.81	75.89	191.07	44	64	16	24	21	51	16	24	Met-loss+Acetyl [N-Term]	Met-loss [N-Term]; Met-loss+Acetyl [N-Term]	60.81	160.56
Q9Y2X3	Nucleolar protein 58	Homo sapiens	NOP58	cell growth;metabolic process	cytosol;membrane;nucleus	protein binding;RNA binding	Ribosome biogenesis in eukaryotes	Major pathway of rRNA processing in the nucleolus and cytosol; rRNA modification in the nucleus and cytosol; SUMOylation of RNA binding proteins	111.602	50.12	36	20	17	8	46	23	17	8			150.52	75.87	61.774	58.009	27	22	11	9	44	24	11	9			132.26	80.9
Q9Y3F4	Serine-threonine kinase receptor-associated protein	Homo sapiens	STRAP	cell organization and biogenesis;metabolic process;regulation of biological process	cytoplasm;cytosol;nucleus	protein binding;RNA binding	RNA transport	Downregulation of TGF-beta receptor signaling	75.146	173.985	55	63	14	20	16	42	14	20			55.48	141.05	50.727	166.841	38	67	9	22	10	41	9	22			35.42	140.21
Q9Y5Q9	General transcription factor 3C polypeptide 3	Homo sapiens	GTF3C3	metabolic process;regulation of biological process	membrane;nucleus	DNA binding;protein binding		RNA Polymerase III Abortive And Retractive Initiation; RNA Polymerase III Transcription Initiation From Type 1 Promoter; RNA Polymerase III Transcription Initiation From Type 2 Promoter	148.905	84.609	35	22	27	14	43	24	27	14	Phospho [S43(100)]		147.33	78.44	65.989	97.832	24	29	16	19	20	33	16	19			61.7	100.64
Q9Y696	Chloride intracellular channel protein 4	Homo sapiens	CLIC4	cell differentiation;cell organization and biogenesis;cellular homeostasis;metabolic process;regulation of biological process;response to stimulus;transport	cell surface;cytoplasm;cytoskeleton;cytosol;membrane;mitochondrion;nucleus	catalytic activity;protein binding;transporter activity			58.334	74.614	59	70	11	13	15	22	11	13		Met-loss [N-Term]	50.23	68.76	53.171	80.506	53	64	9	15	14	20	9	14			50.96	67.23
Q9Y6X9	ATPase MORC2	Homo sapiens	MORC2	metabolic process	cytoplasm;cytosol;nucleus	metal ion binding;protein binding		Fatty acyl-CoA biosynthesis	63.696	89.429	19	25	16	23	28	47	16	23	Met-loss+Acetyl [N-Term]; Phospho [S743(100)]	Met-loss+Acetyl [N-Term]; Phospho [S615(100); S743(100)]	85.58	118.81	52.478	110.772	16	29	15	25	21	57	15	25	Met-loss+Acetyl [N-Term]	Met-loss+Acetyl [N-Term]	50.12	167.2

## Sheet: Legend
Accession	alphanumeric code by UniProtKB database
Description	protein name by by UniProtKB database
Organism	specie
Gene Symbol	Gene Symbol by UniProtKB database
Biological Process	ProteinCenter GO Biological Process
Cellular Component	ProteinCenter GO Cellular Component
Molecular Function	ProteinCenter GO Molecular Function
KEGG Pathways	Pathways by Reactome database
Reactome Pathways	Pathways by KEGG database
Sum Pep score	Score calculated by Protein FDR Validator node on the basis of the PEP values of the PSMs
Coverage [%]	The percentage of the sequence covered by identifications (PSMs only) from the included searches
# Peptides	The total number of distinct peptide sequences identified for the protein
# PSMs	The total number of peptide spectrum matches identified from all included searches
# Unique Peptides	The total number of distinct peptide sequences unique to the protein group
Score Sequest HT	Protein score, which is the sum of the scores of the individual peptides score (all peptide XCorr values)
